# Supplementary material for: Comparative effectiveness of the BNT162b2 and ChAdOx1 vaccines against Covid-19 in people over 50
Source: PubMed Central journal article supplement (PMC8938429; doi:10.1038/s41467-022-29159-x), 2022-03-21
Supplement: 41467_2022_29159_MOESM1_ESM.pdf [file 41467_2022_29159_MOESM1_ESM.pdf]

## Supplementary items

### Contents

|                                                                                                                                |    |
|--------------------------------------------------------------------------------------------------------------------------------|----|
| Supplementary Figure 1: The transmission dynamics of SARS-CoV-2 (A) and its dominant variants (B) during the study period..... | 2  |
| Supplementary Table 2: Baseline characteristics of the one-dose cohorts.....                                                   | 3  |
| Supplementary Table 3: Baseline characteristics of the two-doses cohorts.....                                                  | 6  |
| Supplementary Table 4: Sensitivity analysis (propensity score matching).....                                                   | 9  |
| Supplementary Methods: Sources and timelines for data availability.....                                                        | 10 |
| Supplementary Methods: Construction of the inpatient indicator for UKBB participants .....                                     | 11 |
| Supplementary Methods: Propensity score modelling and inverse probability of treatment weighting.....                          | 12 |

**Supplementary Figure 1: The transmission dynamics of SARS-CoV-2 (A) and its dominant variants (B) during the study period.**

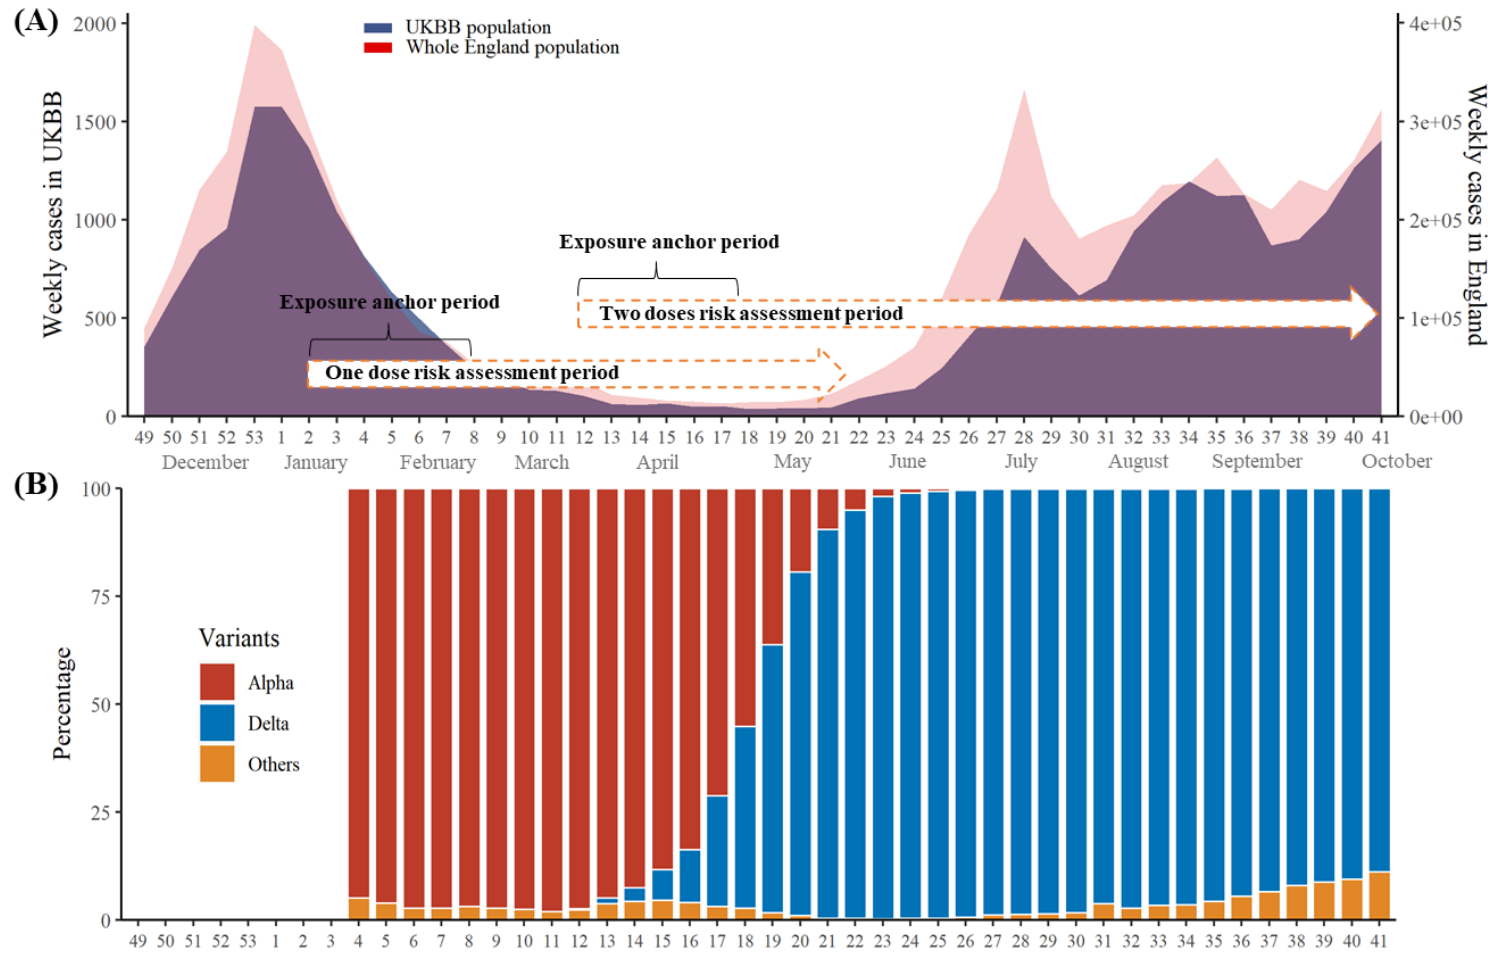

Notes: The data for weekly Covid-19 cases and SARS-CoV-2 variants of concern in England were from the Public Health England (<https://coronavirus.data.gov.uk/>).

**Supplementary Table 2: Baseline characteristics of the one-dose cohorts.**

|                                      | Before weighting |              | After weighting |                 |
|--------------------------------------|------------------|--------------|-----------------|-----------------|
|                                      | BNT162b2         | ChAdOx1      | BNT162b2        | ChAdOx1         |
| Number                               | 70097            | 98551        | 167938          | 167917          |
| <b>Previous infection (%)</b>        | 1843 ( 2.6)      | 2649 ( 2.7)  | 4635.7 ( 2.8)   | 4662.1 ( 2.8)   |
| <b>Vaccination calendar week (%)</b> |                  |              |                 |                 |
| Week2                                | 12224 (17.4)     | 3127 ( 3.2)  | 15716.6 ( 9.4)  | 14681.5 ( 8.7)  |
| Week3                                | 15591 (22.2)     | 15728 (16.0) | 31194.2 (18.6)  | 31220.5 (18.6)  |
| Week4                                | 14783 (21.1)     | 16990 (17.2) | 32056.9 (19.1)  | 32096.3 (19.1)  |
| Week5                                | 7655 (10.9)      | 24264 (24.6) | 31629.9 (18.8)  | 31957.0 (19.0)  |
| Week6                                | 7573 (10.8)      | 19492 (19.8) | 26858.2 (16.0)  | 27070.1 (16.1)  |
| Week7                                | 5907 ( 8.4)      | 11282 (11.4) | 16731.3 (10.0)  | 17059.5 (10.2)  |
| Week8                                | 6364 ( 9.1)      | 7668 ( 7.8)  | 13751.8 ( 8.2)  | 13832.5 ( 8.2)  |
| <b>Demographics</b>                  |                  |              |                 |                 |
| Age, mean (sd)                       | 71.35 (7.21)     | 71.06 (6.02) | 71.09 (6.68)    | 71.11 (6.48)    |
| Sex, male (%)                        | 31203 (44.5)     | 43432 (44.1) | 74111.1 (44.1)  | 74156.6 (44.2)  |
| BMI, mean (sd)                       | 27.56 (4.78)     | 27.46 (4.76) | 27.51 (4.77)    | 27.51 (4.78)    |
| <b>Ethnicity (%)</b>                 |                  |              |                 |                 |
| Asian or Asian British               | 1479 ( 2.1)      | 1563 ( 1.6)  | 3112.1 ( 1.9)   | 3085.9 ( 1.8)   |
| Black or Black British               | 1136 ( 1.6)      | 1138 ( 1.2)  | 2311.8 ( 1.4)   | 2220.0 ( 1.3)   |
| Chinese                              | 224 ( 0.3)       | 263 ( 0.3)   | 478.5 ( 0.3)    | 481.6 ( 0.3)    |
| Do not know                          | 30 ( 0.0)        | 41 ( 0.0)    | 71.5 ( 0.0)     | 75.7 ( 0.0)     |
| Mixed                                | 397 ( 0.6)       | 460 ( 0.5)   | 851.1 ( 0.5)    | 840.7 ( 0.5)    |
| Other ethnic group                   | 657 ( 0.9)       | 703 ( 0.7)   | 1374.9 ( 0.8)   | 1363.6 ( 0.8)   |
| Prefer not to answer                 | 2248 ( 3.2)      | 3102 ( 3.1)  | 5267.6 ( 3.1)   | 5257.8 ( 3.1)   |
| White                                | 63926 (91.2)     | 91281 (92.6) | 154471.3 (92.0) | 154592.2 (92.1) |
| <b>Education (%)</b>                 |                  |              |                 |                 |
| None of the above                    | 12247 (17.5)     | 16502 (16.7) | 28750.7 (17.1)  | 28763.7 (17.1)  |
| Prefer not to answer                 | 2101 ( 3.0)      | 2323 ( 2.4)  | 4455.3 ( 2.7)   | 4320.0 ( 2.6)   |
| College or university degree         | 21484 (30.6)     | 31157 (31.6) | 52075.8 (31.0)  | 52190.1 (31.1)  |
| A levels as levels or equivalent     | 7498 (10.7)      | 11054 (11.2) | 18481.5 (11.0)  | 18474.9 (11.0)  |
| O levels gcs es or equivalent        | 14812 (21.1)     | 20890 (21.2) | 35573.0 (21.2)  | 35668.3 (21.2)  |

|                                                        |               |               |                |                |
|--------------------------------------------------------|---------------|---------------|----------------|----------------|
| Cs es or equivalent                                    | 3473 ( 5.0)   | 4776 ( 4.8)   | 8245.5 ( 4.9)  | 8268.9 ( 4.9)  |
| Nvq or hnd or hnc or equivalent                        | 4605 ( 6.6)   | 6501 ( 6.6)   | 11099.1 ( 6.6) | 11120.0 ( 6.6) |
| Other professional qualifications                      | 3877 ( 5.5)   | 5348 ( 5.4)   | 9257.9 ( 5.5)  | 9111.5 ( 5.4)  |
| <b>Indices of Multiple Deprivation, mean (sd)</b>      |               |               |                |                |
| Townsend deprivation index                             | 17.70 (13.96) | 16.49 (13.37) | 17.08 (13.57)  | 17.01 (13.73)  |
| Income score                                           | 0.12 (0.10)   | 0.11 (0.09)   | 0.11 (0.09)    | 0.11 (0.10)    |
| Employment score                                       | 0.09 (0.06)   | 0.08 (0.06)   | 0.09 (0.06)    | 0.09 (0.06)    |
| Health score                                           | -0.11 (0.89)  | -0.18 (0.88)  | -0.13 (0.89)   | -0.14 (0.89)   |
| Education score                                        | 14.61 (14.90) | 14.13 (14.83) | 14.40 (14.74)  | 14.39 (15.02)  |
| Housing score                                          | 19.94 (9.95)  | 19.80 (9.98)  | 19.70 (9.84)   | 19.69 (9.97)   |
| Crime score                                            | -0.04 (0.78)  | -0.09 (0.77)  | -0.07 (0.77)   | -0.07 (0.77)   |
| <b>Medications (past three years)</b>                  |               |               |                |                |
| Lipid lowering drugs                                   | 33093 (47.2)  | 43266 (43.9)  | 76151.4 (45.3) | 75957.6 (45.2) |
| RAS inhibitors                                         | 21956 (31.3)  | 29023 (29.4)  | 50602.1 (30.1) | 50609.0 (30.1) |
| Other anti-hypertensives                               | 11158 (15.9)  | 14517 (14.7)  | 25459.6 (15.2) | 25458.1 (15.2) |
| Proton pump inhibitors                                 | 30579 (43.6)  | 41572 (42.2)  | 72068.6 (42.9) | 71994.1 (42.9) |
| Diabetes medicines                                     | 6666 ( 9.5)   | 8288 ( 8.4)   | 14982.9 ( 8.9) | 14899.5 ( 8.9) |
| Antidepressants                                        | 14515 (20.7)  | 20199 (20.5)  | 34836.6 (20.7) | 34987.6 (20.8) |
| Systemic glucocorticoids                               | 9282 (13.2)   | 12919 (13.1)  | 22129.9 (13.2) | 22245.6 (13.2) |
| Antithrombotic                                         | 11799 (16.8)  | 15061 (15.3)  | 26856.6 (16.0) | 26832.6 (16.0) |
| Anticoagulants                                         | 3110 ( 4.4)   | 4020 ( 4.1)   | 7099.6 ( 4.2)  | 7130.8 ( 4.2)  |
| Immunosuppressants excl corticosteroids                | 1447 ( 2.1)   | 2017 ( 2.0)   | 3448.5 ( 2.1)  | 3492.0 ( 2.1)  |
| Antineoplastic agents                                  | 180 ( 0.3)    | 251 ( 0.3)    | 413.7 ( 0.2)   | 413.4 ( 0.2)   |
| <b>Hospital admission frequency (past three years)</b> | 1.38 (5.52)   | 1.34 (5.25)   | 1.37 (6.36)    | 1.37 (5.12)    |
| <b>Charlson comorbidity components (past years)</b>    |               |               |                |                |
| Diabetes (uncomplicated)                               | 9193 (13.1)   | 11657 (11.8)  | 20797.9 (12.4) | 20800.9 (12.4) |
| COPD                                                   | 14156 (20.2)  | 19433 (19.7)  | 33547.1 (20.0) | 33504.9 (20.0) |
| Chronic kidney disease                                 | 7449 (10.6)   | 9368 ( 9.5)   | 16714.7 (10.0) | 16713.1 (10.0) |
| Congestive heart failure                               | 1473 ( 2.1)   | 1893 ( 1.9)   | 3344.1 ( 2.0)  | 3370.8 ( 2.0)  |
| Cancer                                                 | 10807 (15.4)  | 14483 (14.7)  | 25028.3 (14.9) | 24975.7 (14.9) |
| Dementia                                               | 681 ( 1.0)    | 959 ( 1.0)    | 1731.3 ( 1.0)  | 1827.9 ( 1.1)  |
| Cerebrovascular disease                                | 2799 ( 4.0)   | 3498 ( 3.5)   | 6356.5 ( 3.8)  | 6324.4 ( 3.8)  |
| Diabetes (end-organ damage)                            | 3821 ( 5.5)   | 4755 ( 4.8)   | 8556.7 ( 5.1)  | 8526.5 ( 5.1)  |

---

|                                    |             |             |               |               |
|------------------------------------|-------------|-------------|---------------|---------------|
| Peripheral vascular disease        | 1459 ( 2.1) | 1857 ( 1.9) | 3276.3 ( 2.0) | 3287.2 ( 2.0) |
| Liver disease (moderate to severe) | 279 ( 0.4)  | 384 ( 0.4)  | 631.3 ( 0.4)  | 646.1 ( 0.4)  |
| Peptic ulcer                       | 2151 ( 3.1) | 2877 ( 2.9) | 5081.0 ( 3.0) | 5018.4 ( 3.0) |
| Rheumatoid arthritis               | 3118 ( 4.4) | 4177 ( 4.2) | 7266.1 ( 4.3) | 7265.0 ( 4.3) |
| Myocardial infarction              | 2573 ( 3.7) | 3254 ( 3.3) | 5890.7 ( 3.5) | 5866.9 ( 3.5) |
| AIDS                               | 137 ( 0.2)  | 183 ( 0.2)  | 320.8 ( 0.2)  | 310.5 ( 0.2)  |
| Malignant cancer                   | 370 ( 0.5)  | 502 ( 0.5)  | 859.2 ( 0.5)  | 836.4 ( 0.5)  |
| Liver disease (mild)               | 452 ( 0.6)  | 650 ( 0.7)  | 1105.4 ( 0.7) | 1110.2 ( 0.7) |
| Hemiplegia                         | 98 ( 0.1)   | 147 ( 0.1)  | 263.2 ( 0.2)  | 250.8 ( 0.1)  |

---

**Supplementary Table 3: Baseline characteristics of the two-doses cohorts.**

|                                      | Before weighting |              | After weighting |                 |
|--------------------------------------|------------------|--------------|-----------------|-----------------|
|                                      | BNT162b2         | ChAdOx1      | BNT162b2        | ChAdOx1         |
| Number                               | 67813            | 89030        | 156301          | 156952          |
| <b>Previous infection (%)</b>        | 2539 ( 2.9)      | 1818 ( 2.7)  | 4518.5 ( 2.9)   | 4498.7 ( 2.9)   |
| <b>Vaccination calendar week (%)</b> |                  |              |                 |                 |
| Week12                               | 8299 (12.2)      | 3972 ( 4.5)  | 12366.1 ( 7.9)  | 12606.7 ( 8.0)  |
| Week13                               | 13558 (20.0)     | 4373 ( 4.9)  | 18073.8 (11.6)  | 17812.4 (11.3)  |
| Week14                               | 12976 (19.1)     | 13900 (15.6) | 26803.0 (17.1)  | 26791.8 (17.1)  |
| Week15                               | 13365 (19.7)     | 16445 (18.5) | 29957.9 (19.2)  | 29935.1 (19.1)  |
| Week16                               | 6892 (10.2)      | 21591 (24.3) | 28278.7 (18.1)  | 28468.5 (18.1)  |
| Week17                               | 7037 (10.4)      | 16945 (19.0) | 23698.1 (15.2)  | 23941.3 (15.3)  |
| Week18                               | 5686 ( 8.4)      | 11804 (13.3) | 17123.5 (11.0)  | 17396.8 (11.1)  |
| <b>Demographics</b>                  |                  |              |                 |                 |
| Age, mean (sd)                       | 72.47 (6.97)     | 71.51 (5.98) | 71.80 (6.74)    | 71.81 (6.18)    |
| Sex, male (%)                        | 29825 (44.0)     | 39250 (44.1) | 68880.5 (44.1)  | 69199.6 (44.1)  |
| BMI, mean (sd)                       | 27.47 (4.67)     | 27.46 (4.74) | 27.50 (4.72)    | 27.50 (4.75)    |
| <b>Ethnicity (%)</b>                 |                  |              |                 |                 |
| Asian or Asian British               | 1279 ( 1.9)      | 1348 ( 1.5)  | 2656.8 ( 1.7)   | 2641.7 ( 1.7)   |
| Black or Black British               | 924 ( 1.4)       | 969 ( 1.1)   | 1957.9 ( 1.3)   | 1921.4 ( 1.2)   |
| Chinese                              | 185 ( 0.3)       | 225 ( 0.3)   | 405.8 ( 0.3)    | 409.4 ( 0.3)    |
| Do not know                          | 26 ( 0.0)        | 37 ( 0.0)    | 68.3 ( 0.0)     | 66.4 ( 0.0)     |
| Mixed                                | 345 ( 0.5)       | 408 ( 0.5)   | 730.0 ( 0.5)    | 735.3 ( 0.5)    |
| Other ethnic group                   | 560 ( 0.8)       | 613 ( 0.7)   | 1182.2 ( 0.8)   | 1171.0 ( 0.7)   |
| Prefer not to answer                 | 2143 ( 3.2)      | 2737 ( 3.1)  | 4807.1 ( 3.1)   | 4881.0 ( 3.1)   |
| White                                | 62351 (91.9)     | 82693 (92.9) | 144492.9 (92.4) | 145126.1 (92.5) |
| <b>Education (%)</b>                 |                  |              |                 |                 |
| None of the above                    | 12648 (18.7)     | 15435 (17.3) | 28036.2 (17.9)  | 28234.6 (18.0)  |
| Prefer not to answer                 | 2031 ( 3.0)      | 2116 ( 2.4)  | 4097.4 ( 2.6)   | 4059.5 ( 2.6)   |
| College or university degree         | 20513 (30.2)     | 27567 (31.0) | 47638.2 (30.5)  | 47836.8 (30.5)  |
| A levels as levels or equivalent     | 7069 (10.4)      | 9848 (11.1)  | 16888.3 (10.8)  | 16951.9 (10.8)  |
| O levels gcs es or equivalent        | 14183 (20.9)     | 19030 (21.4) | 33181.6 (21.2)  | 33314.8 (21.2)  |

|                                                        |               |               |                |                |
|--------------------------------------------------------|---------------|---------------|----------------|----------------|
| Cs es or equivalent                                    | 2970 ( 4.4)   | 4142 ( 4.7)   | 7166.0 ( 4.6)  | 7180.5 ( 4.6)  |
| Nvq or hnd or hnc or equivalent                        | 4440 ( 6.5)   | 5916 ( 6.6)   | 10415.2 ( 6.7) | 10483.2 ( 6.7) |
| Other professional qualifications                      | 3959 ( 5.8)   | 4976 ( 5.6)   | 8878.2 ( 5.7)  | 8891.1 ( 5.7)  |
| <b>Indices of Multiple Deprivation, mean (sd)</b>      |               |               |                |                |
| Townsend deprivation index                             | 17.35 (13.69) | 16.39 (13.27) | 17.00 (13.51)  | 16.97 (13.62)  |
| Income score                                           | 0.11 (0.09)   | 0.11 (0.09)   | 0.11 (0.09)    | 0.11 (0.09)    |
| Employment score                                       | 0.09 (0.06)   | 0.08 (0.06)   | 0.09 (0.06)    | 0.09 (0.06)    |
| Health score                                           | -0.12 (0.89)  | -0.18 (0.88)  | -0.14 (0.88)   | -0.14 (0.88)   |
| Education score                                        | 14.39 (14.77) | 14.10 (14.80) | 14.35 (14.72)  | 14.35 (14.96)  |
| Housing score                                          | 19.85 (9.90)  | 19.66 (9.92)  | 19.64 (9.80)   | 19.66 (9.97)   |
| Crime score                                            | -0.05 (0.78)  | -0.09 (0.77)  | -0.07 (0.77)   | -0.07 (0.77)   |
| <b>Medications (past three years)</b>                  |               |               |                |                |
| Lipid lowering drugs                                   | 33138 (48.9)  | 40248 (45.2)  | 73220.9 (46.8) | 73457.8 (46.8) |
| RAS inhibitors                                         | 21768 (32.1)  | 26794 (30.1)  | 48369.8 (30.9) | 48521.5 (30.9) |
| Other anti-hypertensives                               | 11297 (16.7)  | 13489 (15.2)  | 24636.9 (15.8) | 24732.6 (15.8) |
| Proton pump inhibitors                                 | 30074 (44.3)  | 38128 (42.8)  | 68201.9 (43.6) | 68396.9 (43.6) |
| Diabetes medicines                                     | 6168 ( 9.1)   | 7556 ( 8.5)   | 13866.2 ( 8.9) | 13854.3 ( 8.8) |
| Antidepressants                                        | 13877 (20.5)  | 18277 (20.5)  | 32391.9 (20.7) | 32511.1 (20.7) |
| Systemic glucocorticoids                               | 9126 (13.5)   | 11585 (13.0)  | 20797.3 (13.3) | 20784.2 (13.2) |
| Antithrombotic                                         | 11903 (17.6)  | 14077 (15.8)  | 26024.1 (16.6) | 26049.1 (16.6) |
| Anticoagulants                                         | 3392 ( 5.0)   | 3969 ( 4.5)   | 7289.0 ( 4.7)  | 7271.8 ( 4.6)  |
| Immunosuppressants excl corticosteroids                | 1357 ( 2.0)   | 1823 ( 2.0)   | 3216.2 ( 2.1)  | 3222.4 ( 2.1)  |
| Antineoplastic agents                                  | 185 ( 0.3)    | 232 ( 0.3)    | 411.4 ( 0.3)   | 398.8 ( 0.3)   |
| <b>Hospital admission frequency (past three years)</b> | 1.39 (5.82)   | 1.32 (5.02)   | 1.37 (6.36)    | 1.36 (4.89)    |
| <b>Charlson comorbidity components (past years)</b>    |               |               |                |                |
| Diabetes (uncomplicated)                               | 8663 (12.8)   | 10667 (12.0)  | 19443.3 (12.4) | 19495.5 (12.4) |
| COPD                                                   | 13737 (20.3)  | 17715 (19.9)  | 31566.4 (20.2) | 31582.3 (20.1) |
| Chronic kidney disease                                 | 7746 (11.4)   | 8924 (10.0)   | 16513.0 (10.6) | 16558.8 (10.6) |
| Congestive heart failure                               | 1548 ( 2.3)   | 1814 ( 2.0)   | 3355.0 ( 2.1)  | 3359.2 ( 2.1)  |
| Cancer                                                 | 10937 (16.1)  | 13601 (15.3)  | 24305.2 (15.6) | 24366.2 (15.5) |
| Dementia                                               | 820 ( 1.2)    | 1004 ( 1.1)   | 1871.1 ( 1.2)  | 1942.2 ( 1.2)  |
| Cerebrovascular disease                                | 2860 ( 4.2)   | 3327 ( 3.7)   | 6199.3 ( 4.0)  | 6173.1 ( 3.9)  |
| Diabetes (end-organ damage)                            | 3638 ( 5.4)   | 4411 ( 5.0)   | 8099.5 ( 5.2)  | 8084.2 ( 5.2)  |

---

|                                    |             |             |               |               |
|------------------------------------|-------------|-------------|---------------|---------------|
| Peripheral vascular disease        | 1513 ( 2.2) | 1760 ( 2.0) | 3258.4 ( 2.1) | 3256.7 ( 2.1) |
| Liver disease (moderate to severe) | 258 ( 0.4)  | 348 ( 0.4)  | 605.6 ( 0.4)  | 606.2 ( 0.4)  |
| Peptic ulcer                       | 2190 ( 3.2) | 2684 ( 3.0) | 4912.0 ( 3.1) | 4898.0 ( 3.1) |
| Rheumatoid arthritis               | 3225 ( 4.8) | 3939 ( 4.4) | 7172.6 ( 4.6) | 7153.7 ( 4.6) |
| Myocardial infarction              | 2541 ( 3.7) | 3053 ( 3.4) | 5663.6 ( 3.6) | 5663.5 ( 3.6) |
| AIDS                               | 131 ( 0.2)  | 164 ( 0.2)  | 294.3 ( 0.2)  | 288.0 ( 0.2)  |
| Malignant cancer                   | 352 ( 0.5)  | 462 ( 0.5)  | 789.2 ( 0.5)  | 804.3 ( 0.5)  |
| Liver disease (mild)               | 421 ( 0.6)  | 579 ( 0.7)  | 1005.7 ( 0.6) | 1022.9 ( 0.7) |
| Hemiplegia                         | 90 ( 0.1)   | 123 ( 0.1)  | 225.5 ( 0.1)  | 222.0 ( 0.1)  |

---



**Supplementary Table 4: Sensitivity analysis (propensity score matching)**

|                          | BNT162b2 vs ChAdOx1 |            |            |                    |
|--------------------------|---------------------|------------|------------|--------------------|
|                          | Number              | Events     | Incidence  | HRs                |
| After first-dose         |                     |            |            |                    |
| Covid-19 infection       | 58676/ 58676        | 154/ 193   | 12.6/ 15.7 | 0.80 (0.65 - 0.99) |
| Covid-19 hospitalization | 58676/ 58676        | 29/ 32     | 2.36/ 2.60 | 0.91 (0.55 - 1.51) |
| After second-dose        |                     |            |            |                    |
| Covid-19 infection       | 54422/ 54422        | 1089/ 1582 | 39.5/ 57.6 | 0.69 (0.63 - 0.74) |
| Covid-19 hospitalization | 54422/ 54422        | 93/ 142    | 3.35/ 5.13 | 0.65 (0.50 - 0.85) |

**Supplementary Methods: Sources and timelines for data availability**

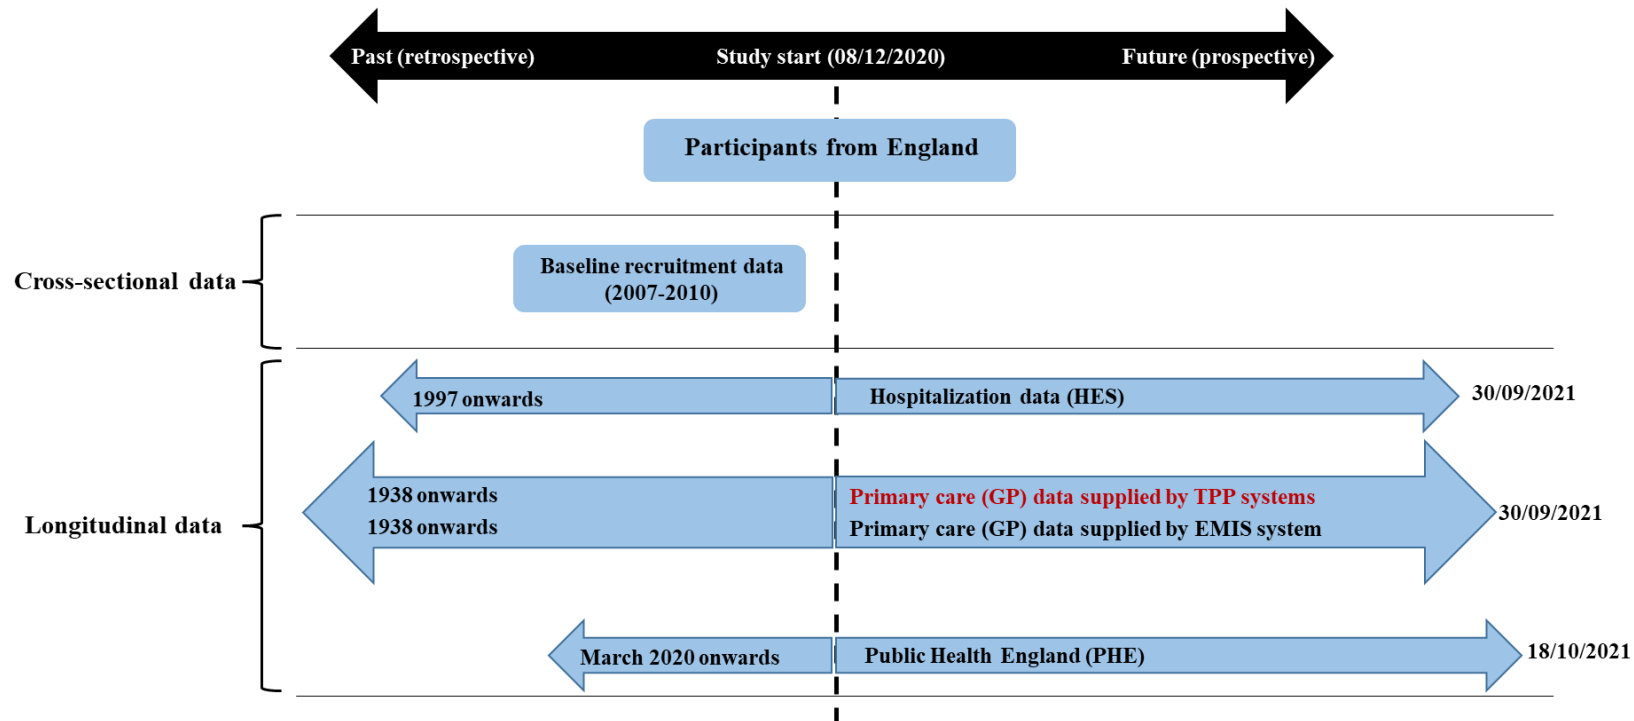

The baseline recruitment data includes detailed demographic, socioeconomic, lifestyle factors, and physical activities information. The HES data includes hospital administration, operations and diagnoses information. The GP data includes diagnoses and prescription information. Of note, the Covid-19 vaccination has been integrated into EMIS GP's prescription records but not into the TPP. The PHE data includes Covid-19 test results.

### Supplementary Methods: Construction of the inpatient indicator for UKBB participants

The construction of the "origin" field is based on information provided on the specimen request form. If the specimen was marked as being from an acute (emergency) care provider, an A&E department, an inpatient location, or resulted from health care associated infection, it is recorded by PHE as an inpatient sample. Tests marked as being from "Healthcare Worker Testing" are never recorded as inpatient samples, though some may also carry an acute flag.

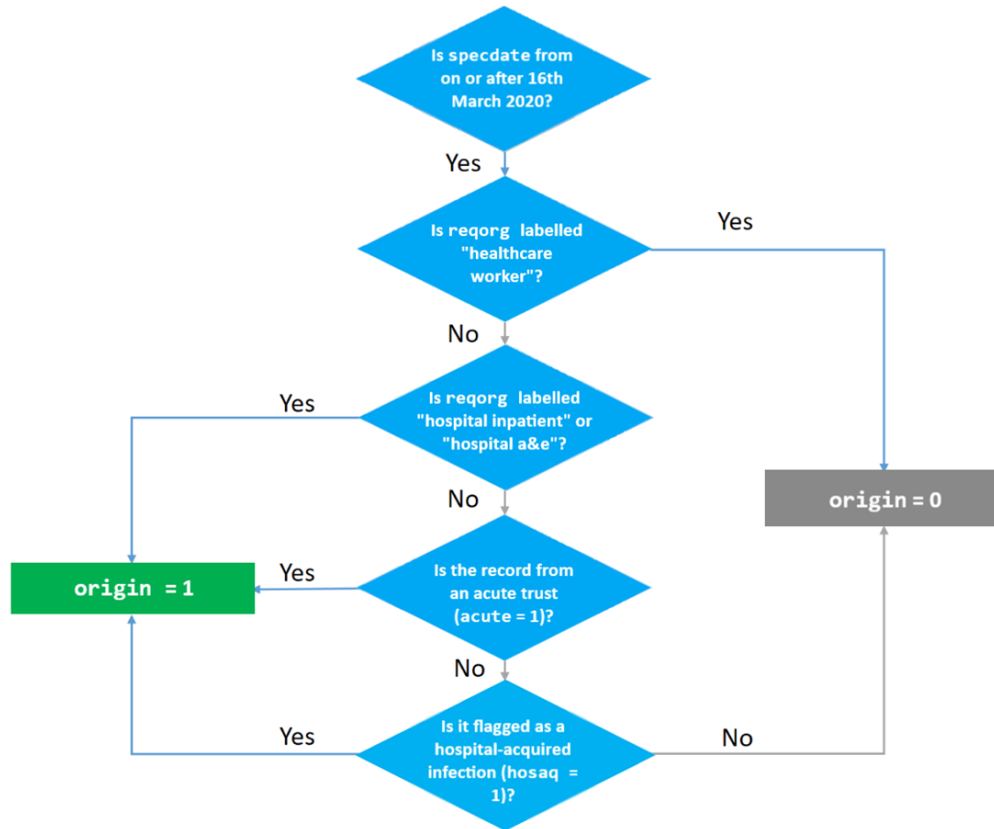

The aim of designating inpatient status for the SARS-CoV-2 test was to indicate severity of Covid-19 infection. SARS-CoV-2 tests taken in hospital can be undertaken for several reasons including symptomatic patients requiring hospital admission, or general inpatient screening, which includes asymptomatic patients. Furthermore, the algorithm used to flag inpatient status may not necessarily indicate inpatient care in all cases. For example, some tests flagged as coming from "acute" trusts will likely not be inpatients, since these trusts may also perform tests on behalf of GPs and others, and tests requested by A&E may be for patients who are not then admitted.

The flow chart below illustrates the logic used by PHE to generate an indicator of whether a test result was obtained from a hospital inpatient or not (depicted as the "origin" field in the covid19\_result table). The fields used to construct the "origin" field have also been released to enable researchers to replicate it and construct their own alternatives if desired.

PHE's designation of inpatient status can be compared to hospital episodes statistics (HES) dates of admission and discharge made by NHS trusts. A comparison between SARS-CoV-2 positive inpatient status versus inpatient diagnosis codes (ICD-10 diagnosis codes U071 or U072) for Covid-19 (from HES) can also be made. For

further details, see the following webpage: <https://news.bugbank.uk/2020/08/identifying-inpatients-comparison-to.html>.

### Supplementary Methods: Propensity score modelling and inverse probability of treatment weighting

We calculated propensity scores for a vaccination with BNT162b2 against ChAdOx1 using logistic regression. The variables included in the model were previous Covid-19 infection status (binary), age on the vaccination date (continuous linear), sex (binary), ethnicity (categorical, collected at the UK Biobank recruitment), multiple socio-economic deprivation scores (Townsend deprivation index, income score, employment score, health score, education score, housing score, and crime score; continuous linear, collected at the UK Biobank recruitment), education levels (categorical, collected at the UK Biobank recruitment), body mass index (continuous linear, collected at the UK Biobank recruitment), a list of pre-specified medications (binary, obtained from primary care prescription records), the number of hospital admissions (continuous linear, obtained from HES), and comorbidities (binary, obtained from primary care diagnosis records). The weights for each participant were then computed based on the Rosenbaum formula:  $Wi = \frac{Zi}{ei} + \frac{(1-Zi)}{(1-ei)}$ .<sup>27</sup> To reduce unstable estimate due to extreme weights in the tails of the propensity score distribution, we used asymmetric trimming to exclude people whose propensity score was below the 1<sup>th</sup> percentile of the propensity score of the BNT162b2 cohort and above the 99<sup>th</sup> percentile of the propensity score of the ChAdOx1 cohort.<sup>28</sup>
